# Supplementary material for: Clinical Phenotypes of COVID-19 Associated Mucormycosis (CAM): A Comprehensive Review
Source: MDPI journal article supplement (doi:10.3390/diagnostics12123092), 2022-12-08
Supplement: s1 [file s1]

**Table S1: Interval between CAM diagnosis and COVID-19 diagnosis and other comorbidities described**

| Study                     | Days after diagnosis | Other comorbidities (% of CAM pts)                                                                                                                                       |
|---------------------------|----------------------|--------------------------------------------------------------------------------------------------------------------------------------------------------------------------|
| Said Ahmed WM et al. [29] | 14–30 post recovery  | NA                                                                                                                                                                       |
| Murthy R et al. [30]      | NA                   | NA                                                                                                                                                                       |
| Walia S et al. [31]       | 22.56 ± 4.78         | Remdesivir (28.89%)<br>Oxygen treatment (52.40%)                                                                                                                         |
| Vare AA et al. [32]       | 15 post recovery     | NIV or MV (27%),<br>Prolonged oxygen treatment (78%)                                                                                                                     |
| Fouad YA et al. [33]      | 20.5                 | HTN (26.9%),<br>CKD (11.5%),<br>IHD (7.7%),<br>Bronchial Asthma (7.7%),<br>Liver disease (3.8%)                                                                          |
| Soni K te al. [34]        | NA                   | HIV (0.7%),<br>Renal transplant (0.7%),<br>Hematological Malignancy (1.38%),<br>Heart Disease (39.3%)                                                                    |
| Metwally MI et al. [35]   | 3 weeks              | HTN (41.2%),<br>Chronic Liver Disease (11.1%),<br>Heart Failure (7.9%),<br>COPD (6.3%),<br>Bronchial Asthma (3.1%),<br>Thyrotoxicosis (1.5%),<br>Multiple Myeloma (1.5%) |
| Arora U et al. [36]       | 18.9 (SD 9.1)        | Significant association with CAM : Number of times swab testing,                                                                                                         |
| Jindal G et al. [37]      | NA                   | HTN (33%)                                                                                                                                                                |
| Syed-Abdul S et al. [38]  | NA                   | NA                                                                                                                                                                       |
| Patel A et al. [3]        | NA                   | NA                                                                                                                                                                       |
| Pruthi H et al. [39]      | 23.6                 | NA                                                                                                                                                                       |
| Bansal SB et al. [40]     | 17                   | NA                                                                                                                                                                       |
| Dulski TM et al. [41]     | 18.5                 | SOT (10%)                                                                                                                                                                |
| Meshram HS et al. [42]    | NA                   | CKD (8.2%),<br>HTN (31.1%),<br>IgA Nephropathy (3.3%),<br>Renal stone disease (8.2%),<br>Chronic Glomerulonephritis (18%), Autosomal polycystic kidney (3.3%)            |
| Aggarwal SK et al. [43]   | NA                   | HTN (38.4%)                                                                                                                                                              |
| Kulkarni R et al. [44]    | 18                   | HTN (36.7%)                                                                                                                                                              |
| Choksi T et al. [45]      | 28                   | NA                                                                                                                                                                       |
| Kumar S et al. [46].      | 10-20                | NA                                                                                                                                                                       |

|                           |                         |                                                                                                            |
|---------------------------|-------------------------|------------------------------------------------------------------------------------------------------------|
| Mehta R et al. [47]       | 2-5 weeks post recovery | HTN (35.3%)                                                                                                |
| Panwar P et al. [48]      | 11.4                    | NA                                                                                                         |
| Patel DD et al. [49]      | NA                      | HTN (39.6%),<br>IHD (6.2%)                                                                                 |
| Vaid N et al. [50]        | NA                      | NA                                                                                                         |
| Goddanti N et al. [51]    | NA                      | Oxygen Treatment (60%)                                                                                     |
| Yadav T et al. [52]       | 14.2 ± 7.12             | NA                                                                                                         |
| Meshram VB et al. [53]    | 7 post recovery         | HTN (72.7%)                                                                                                |
| Zirpe K et al. [54]       | 11                      | HTN (36.9%)                                                                                                |
| Alloush TK et al. [55]    | 12.5                    | HTN (42.8%),<br>CKD (14.2%),<br>IHD (7.1%)                                                                 |
| Pal P et al. [56]         | 22.9                    | NA                                                                                                         |
| Danion F et al. [57]      | 24                      | SOT<br>Hematological Malignancies (41%),<br>Renal Failure (65%)                                            |
| Nehara HR et al. [58]     | 15                      | Hematologic malignancy (1.9%)                                                                              |
| Pandiar D et al. [59]     | NA                      | NA                                                                                                         |
| Kumar S et al. [60]       | NA                      | Zinc (89.1%),<br>HTN 31/55 (56.4%),                                                                        |
| Bilgic A et al. [61]      | 17.5                    | HTN (13%),<br>Hypothyroidism (10.5%),<br>Renal Dysfunction (2.6%),<br>Rheumatoid Arthritis (2.6%)          |
| Guemas E et al. [62]      | 4.5                     | NA                                                                                                         |
| Kumar SG et al. [63]      | NA                      | NA                                                                                                         |
| Mani S et al. [64]        | 17.36 ± 7.3             | NA                                                                                                         |
| Dravid A et al. [65]      | 17                      | HTN (40.7%),<br>CKD (15.3%),<br>IHD(11.9%),<br>Chronic liver disease (3.4%)                                |
| Naruka S et al. [66]      | NA                      | NA                                                                                                         |
| Jain K et al. [67]        | 20                      | NA                                                                                                         |
| Bhanuprasad K et al. [68] | NA                      | Chronic lung disease (2.3%),<br>IHD (3.8%),<br>CKD (5.3%),<br>Cerebrovascular events (1.5%),<br>HIV (1.5%) |
| Desai EJ et al. [69]      | NA                      | HTN (33%),<br>IHD (9%),<br>Hypothyroidism (2%),<br>CKD (4%)                                                |
| Nasir \n et al. [70]      | 16                      | Haematological malignancies (20%), Tocilizumab treatment (20%)                                             |
| Gupta\s et al. [71]       | NA                      | HTN (27%)                                                                                                  |

|                             |                    |                                                                                          |
|-----------------------------|--------------------|------------------------------------------------------------------------------------------|
| Joshi S et al. [4]          | 28                 | HIV (0.56%),<br>HTN (27%),<br>CKD (3%),<br>Cardiomyopathy (2%),<br>Bronchial Asthma (1%) |
| Pradhan P et al. [72]       | NA                 | NA                                                                                       |
| Mehta RNM et al. [73]       | NA                 | NA                                                                                       |
| Riad A et al. [74]          | NA                 | NA                                                                                       |
| Guzmán-Castro S et al. [75] | 15                 | NA                                                                                       |
| Seidel D et al. [76]        | 10                 | Immunosuppression (38.46%)                                                               |
| Gupta R et al. [77]         | NA                 | IHD (15.6%),<br>CKD (10.4%),<br>Renal transplant (2.6%)                                  |
| Alfishawy M et al. [78]     | NA                 | NA                                                                                       |
| Dave TV et al. [79]         | 16 ± 21            | NA                                                                                       |
| Selarka L et al. [80]       | 12.1 ± 4.6         | HTN (57.4%),<br>IHD (12.7%),<br>COPD (4.3%)                                              |
| Avatef Fazeli M et al. [81] | 25.66 ± 12.84      | HTN (58.33%)<br>IHD (33.33%)<br>CKD (16.66%)                                             |
| Mishra Y et al. [82]        | NA                 | HTN (50%),<br>IHD (6.3%)                                                                 |
| Sen M et al. [83]           | 14.5 ± 10          | HTN (80%),<br>Renal disease (10%),<br>Bronchial Asthma (2%)                              |
| Pakdel F et al. [84]        | 7 (range: 1-37)    | NA                                                                                       |
| Y M. Reddy et al. [85]      | NA                 | Renal dysfunction                                                                        |
| R.Arora et al. [86]         | 17                 | HTN, IHD, CKD, thyroid dysfunction                                                       |
| D.P Gupta et al. [87]       | NA                 | Renal transplant, acute myeloid leukemia                                                 |
| M.Gautam et al. [88]        | NA                 | NA                                                                                       |
| R.M.Mehta et al. [89]       | 25.8               | HTN, CKD, IHD                                                                            |
| Y.M.Reddy et al. [90]       | 16.28 ± 6.6        | HTN, CKD, IHD, hypothyroidism, asthma, epilepsy, stroke                                  |
| S.P.Singh et al. [91]       | 15.3               | NA                                                                                       |
| M.Hada et al. [92]          | 12.4               | NA                                                                                       |
| M. Kumar H et al. [93]      | NA                 | NA                                                                                       |
| S. Bhandari et al. [94]     | Within 45 days     | HTN, CKD, malignancy                                                                     |
| M Chouhan et al. [95]       | 2-48               | CKD                                                                                      |
| Y. Singh et al. [96]        | NA                 | HTN, renal transplant, hypothyroidism, asthma, malignancy, IHD                           |
| S M Desai et al. [97]       | 10 days – 5 months | HTN, malignancy                                                                          |
| A. Kumari et al. [98]       | NA                 | CKD, liver disease                                                                       |
| S. Mitra et al. [99]        | 18 ± 4             | HTN, CKD                                                                                 |
| A Ramaswami et al. [100]    | 20                 | HTN, IHD, SOT, CKD                                                                       |

|                              |                         |                                            |
|------------------------------|-------------------------|--------------------------------------------|
| A.R. Joshi et al. [101]      | NA                      | HIV                                        |
| A. Patel et al. [102]        | 18                      | Hematological malignancy, Renal transplant |
| S Sharma et al. [103]        | NA                      | HTN, renal failure                         |
| R. Kant et al. [104]         | NA                      | HTN, CKD, COPD                             |
| C. Eker et al. [105]         | 30.3 ± 26.6             | NA                                         |
| A.K. Pandit et al. [106]     | 4                       | HTN, obesity                               |
| S.F. Youssif et al. [107]    | NA                      | HTN, CKD, liver disease, cardiac disease   |
| A. Sekaran, et al. [108]     | NA                      | HTN, AKI                                   |
| R. R. Shabana et al. [109]   | 2.8 weeks post recovery | NA                                         |
| A. K Patel et al. [110]      | 23.4 ± 9.3              | Cardiovascular disease, lung disease, CKD  |
| H. D.D. Martins et al. [111] | NA                      | HTN, non-Hodgkin lymphoma                  |
| S. Iqtadar et al. [112]      | NA                      | HTN, CKD, asthma                           |
| A. Al Balushi et al. [113]   | 10d-3 w                 | NA                                         |
| R. Soman et al. [114]        | NA                      | HTN, CKD                                   |

AKI: Acute kidney Injury, CKD: chronic kidney disease, COPD: chronic obstructive pulmonary disease, IHD: ischemic heart disease, HTN: hypertension, MV : Mechanical Ventilation, NA : Not Available, NIV: Non Invasive Ventilation, SOT : Solid Organ Transplantation

**Table S2: Cases of pulmonary mucormycosis associated with COVID-19**

| <b>Study</b>                | <b>n</b> | <b>MV</b>     | <b>CAPA</b>  | <b>Mortality</b> |
|-----------------------------|----------|---------------|--------------|------------------|
| Walia S et al. [31]         | 1        | NA            | NA           | NA               |
| Arora U et al. [36]         | 2        | NA            | NA           | NA               |
| Patel A et al. [3]          | 1        | NA            | NA           | NA               |
| Pruthi H et al [39]         | 5        | 0/5 (0%)      | NA           | 4/5 (80%)        |
| Bansal SB et al. [40]       | 1        | 0/1 (0%)      | NA           | 0/1 (0%)         |
| Dulski TM et al. [41]       | 3        | NA            | NA           | NA               |
| Meshram HS et al. [42]      | 5        | 0/5 (0%)      | NA           | 5/5 (100%)       |
| Meshram VB et al. [53]      | 1        | 0/1 (0%)      | NA           | 1/1 (100%)       |
| Danion F et al. [57]        | 9        | 7/9 (77.8%)   | 2/9 (22.2%)  | 8/9 (88.9%)      |
| Guemas E et al. [62]        | 10       | ICU pts       | 8/10 (80%)   | 5/10 (50%)       |
| Nasir \n et al. [70]        | 6        | 3/6 (50%)     | 3/6 (50%)    | 6/6 (100%)       |
| Guzmán-Castro S et al. [75] | 1        | 1/1 (100%)    | 0/1 (0%)     | 1/1 (100%)       |
| Seidel D et al. [76]        | 11       | 10/11 (90.9%) | 2/11 (18.2%) | 6/11 (54.5%)     |

|                         |    |            |            |            |
|-------------------------|----|------------|------------|------------|
| Alfishawy M et al. [78] | 1  | NA         | 1/1 (100%) | 0/1 (0%)   |
| R.M.Mehta et al [89]    | 5  | 4/5 (80%)  | 3/5 (60%)  | 4/5 (80%)  |
| M. Kumar H et al. [93]  | 4  | NA         | NA         | 2/4 (50%)  |
| Y. Singh et al. [96]    | 1  | 1/1 (100%) | NA         | 1/1 (100%) |
| A. Patel et al. [102]   | 16 | NA         | NA         | NA         |
| R. Kant et al. [104]    | 4  | NA         | NA         | NA         |
| A. K Patel et al. [110] | 5  | NA         | NA         | NA         |
| R. Soman et al. [114]   | 6  | NA         | NA         | NA         |

MV: mechanical ventilation, NA: not available, CAPA: COVID-19 Associated Pulmonary Aspergillosis

**Table S3: Studies containing data on PCR and species identification**

| Study                      | PCR                                                                                                | Mucorales species                                                                                                                                                                                                     |
|----------------------------|----------------------------------------------------------------------------------------------------|-----------------------------------------------------------------------------------------------------------------------------------------------------------------------------------------------------------------------|
| Patel A et al [3]          | NA                                                                                                 | <i>Rhizopus arrhizus</i> (8/29),<br><i>Cunninghamella bertholletiae</i> (1/29)                                                                                                                                        |
| Pruthi H et al [39]        | 2/5                                                                                                | <i>Rhizopus arrhizus</i> (2/5),<br><i>Rhizopus homothallicus</i> (1/5),<br><i>Rhizopus microspores</i> (1/5)                                                                                                          |
| Meshram HS et al [42]      | NA                                                                                                 | <i>Rhizopus</i> spp (18/61),<br><i>Rhizomucor</i> (4/61)                                                                                                                                                              |
| Aggarwal SK et al [43]     | NA                                                                                                 | <i>Mucor</i> spp,<br><i>Rhizopus</i> spp                                                                                                                                                                              |
| Danion F et a. [57]        | Positive: 15/17 (88%)<br>Serum (14/17)<br>BAL (7/17)<br>Tissues (3/17)<br>Peritoneal fluid (1/17)] | <i>Rhizopus microsporus</i> (6/17),<br><i>Rhizopus delamar</i> (2/17),<br><i>Rhizopus arrhizus</i> (1/17),<br><i>Rhizomucor pusillus</i> (1/17),<br><i>Rhizomucor miehei</i> (1/17),<br><i>Lichtheimia</i> spp (1/17) |
| Bilgic A et al [61]        | NA                                                                                                 | <i>Rhizopus</i> spp (23/38),<br><i>Mucor</i> spp (8/38),<br><i>Absidia</i> (7/38)                                                                                                                                     |
| Guemas E et al [62]        | 10/141 respiratory samples                                                                         | <i>Mucor</i><br><i>Rhizopus</i>                                                                                                                                                                                       |
| Nasir N et al [70]         | NA                                                                                                 | <i>Rhizopus</i> spp (7/10),<br><i>Mucor</i> spp (2/10)                                                                                                                                                                |
| Mehta NMR et al [73]       | NA                                                                                                 | <i>Rhizopus</i> spp (170/215)<br><i>Lichtemia</i> (28/215)<br><i>Apophysomyces</i> (11/215)                                                                                                                           |
| Riad A et al [74]          | 2/7 (28.5%)                                                                                        | NA                                                                                                                                                                                                                    |
| Guzmán-Castro S et al [75] | NA                                                                                                 | <i>Mucor circinelloides</i> (3/4),<br><i>Rhizopus pucilus</i> (1/4)                                                                                                                                                   |
| Seidel D et al [76]        | NA                                                                                                 | <i>Rhizopus</i> spp. (10/13),                                                                                                                                                                                         |

|                            |     |                                                                                                                                                             |
|----------------------------|-----|-------------------------------------------------------------------------------------------------------------------------------------------------------------|
|                            |     | <i>R Gicrospores</i> (7/13),<br><i>Lichtheimia</i> (2/13),<br><i>Rhizomucor</i> (1/13)                                                                      |
| Alfishawy M et al [78]     | NA  | <i>Mucorales</i> (3/21),<br><i>Rhizopus</i> spp (1/21)                                                                                                      |
| R.M.Mehta et al. [89]      | 2/4 | <i>Rhizopus deleamar</i> (1/5),<br><i>Rhizopus oryzae</i> (1/5)                                                                                             |
| R. Kant et al. [104]       | NA  | <i>Rhizopus arrhizus</i> (36/76), <i>R. Arrihizus</i> (1/76)                                                                                                |
| A. K Patel et al. [110]    | NA  | <i>Rhizopus arrhizus</i> (23/64), <i>Rhizopus Gicrospores</i> (3/64), <i>Rhizopus species</i> (4/64), <i>Cunninghamella</i> (1/64), <i>Mucorales</i> (1/64) |
| A. Al Balushi et al. [113] | NA  | <i>Rhizopus oryzae</i> (8/10)                                                                                                                               |

NA: not available

**Table S4: Concomitant *Aspergillus* isolation.**

| Study                    | Concomitant <i>Aspergillus</i> isolation, n (%) |
|--------------------------|-------------------------------------------------|
| Danion F et al. [57]     | 5/17 (29.4%)                                    |
| Guemas E et al. [62]     | 8/10 (80%)                                      |
| Dravid A et al. [65]     | 3/59 (5.1%)                                     |
| Naruka S et al. [66]     | 16/79 (20.3%)                                   |
| Jain K et al. [67]       | 1/95 (1.1%)                                     |
| Nasir \n et al. [70]     | 4/10 (40%)                                      |
| Seidel D et al. [76]     | 2/13 (15.4%)                                    |
| Alfishawy M et al. [78]  | 4/21 (19%)                                      |
| Selarka L et al. [80]    | 10/47 (21.3%)                                   |
| R. Arora et al. [86]     | 2/37 (5.4%)                                     |
| R.M.Mehta et al [89]     | 3/5 (60%)                                       |
| S M Desai et al. [97]    | 3/50 (6%)                                       |
| S. Mitra et al. [99]     | 1/32 (3.1%)                                     |
| A. Patel et al. [102]    | 1/187 (0.5%)                                    |
| R. Kant et al. [104]     | 14/100 (14%)                                    |
| A. Sekaran, et al. [108] | 1/30 (3.3%)                                     |
| A. K Patel et al. [110]  | 9/64 (14.1%)                                    |
| S. Iqtadar et al. [112]  | 2/7 (28.6%)                                     |

**Table S5: Outcome**

| Study                     | CAM patients (n) | CAM patients that died (n) | Mortality (%) | Risk factors associated with mortality                                                               |
|---------------------------|------------------|----------------------------|---------------|------------------------------------------------------------------------------------------------------|
| Said Ahmed WM et al. [29] | 14               | NA                         | NA            | NA                                                                                                   |
| Murthy R et al. [30]      | NA               | NA                         | NA            | NA                                                                                                   |
| Walia S et al. [31]       | 540              | 50                         | 9.25%         | NA                                                                                                   |
| Vare AA et al. [32]       | 67               | 23                         | 34%           | NA                                                                                                   |
| Fouad YA et al. [33]      | 26               | 12                         | 46,2%         | NA                                                                                                   |
| Soni K te al. [34]        | 145              | 26                         | 18%           | NA                                                                                                   |
| Metwally MI et al. [35]   | 63               | 11                         | 17.5%         | NA                                                                                                   |
| Arora U et al. [36]       | 152              | NA                         | NA            | NA                                                                                                   |
| Jindal G et al. [37]      | 15               | 1                          | 6.6%          | NA                                                                                                   |
| Syed-Abdul S et al. [38]  | 214              | NA                         | NA            | NA                                                                                                   |
| Patel A et al. [3]        | 29               | NA                         | NA            | NA                                                                                                   |
| Pruthi H et al. [39]      | 5                | 4                          | 80%           | NA                                                                                                   |
| Bansal SB et al. [40]     | 11               | 2                          | 18.2%         | NA                                                                                                   |
| Dulski TM et al. [41]     | 10               | 6                          | 60%           | NA                                                                                                   |
| Meshram HS et al. [42]    | 61               | 16                         | 26.2%         | Older age, Obesity, Difficulty of breathing, High-flow oxygen requirement, delay in starting therapy |
| Aggarwal SK et al. [43]   | 13               | 2                          | 15.4%         | NA                                                                                                   |
| Kulkarni R et al. [44]    | 49               | 25                         | 51%.          | NA                                                                                                   |
| Choksi T et al. [45]      | 73               | 26                         | 36%           | NIV/MV, uncontrolled diabetes, HRCT score during COVID 19                                            |
| Kumar S et al. [46].      | 287              | NA                         | NA            | NA                                                                                                   |
| Mehta R et al. [47]       | 17               | NA                         | NA            | NA                                                                                                   |
| Panwar P et al. [48]      | 7                | 0                          | 0%            | NA                                                                                                   |
| Patel DD et al. [49]      | NA               | NA                         | NA            | NA                                                                                                   |
| Vaid N et al. [50]        | 65               | 7                          | 10.7%         | Intracranial involvement                                                                             |
| Goddanti N et al. [51]    | 300              | NA                         | NA            | NA                                                                                                   |
| Yadav T et al. [52]       | 50               | NA                         | NA            | NA                                                                                                   |

|                             |      |     |        |                                                                                                                        |
|-----------------------------|------|-----|--------|------------------------------------------------------------------------------------------------------------------------|
| Meshram VB et al. [53]      | 11   | 3   | 27%    | NA                                                                                                                     |
| Zirpe K et al. [54]         | 84   | 13  | 15.5%  | CKD, orbital involvement, tocilizumab, renal dysfunction                                                               |
| Alloush TK et al. [55]      | 14   | 3   | 21.4%  | NA                                                                                                                     |
| Pal P et al. [56]           | 10   | 3   | 30%    | NA                                                                                                                     |
| Danion F et al. [57]        | 17   | 15  | 88%    | NA                                                                                                                     |
| Nehara HR et al. [58]       | 105  | 20  | 19.05% | ROCM stage≥3c, qSOFA≥2                                                                                                 |
| Pandiar D et al. [59]       | 12   | NA  | NA     | NA                                                                                                                     |
| Kumar S et al. [60]         | 55   | 9   | 16%    | NA                                                                                                                     |
| Bilgic A et al. [61]        | 38   | 2   | 5%     | NA                                                                                                                     |
| Guemas E et al. [62]        | 10   | 5   | 50%    | NA                                                                                                                     |
| Kumar SG et al. [63]        | 101  | 18  | 17.8%  | higher imaging stages                                                                                                  |
| Mani S et al. [64]          | 89   | 3   | 3.4%   | Stage ≥3c (involvement of orbit and CNS)                                                                               |
| Dravid A et al. [65]        | 59   | 15  | 25.4%  | CT severity index≥18, eye swelling, loss of vision, ptosis, limb weakness, diabetic ketoacidosis, cerebral involvement |
| Naruka S et al. [66]        | 79   | 14  | 18.18% | NA                                                                                                                     |
| Jain K et al. [67]          | 95   | 5   | 5.2%   | Severity grade of histopathology.                                                                                      |
| Bhanuprasad K et al. [68]   | 132  | 13  | 9.8%   | NA                                                                                                                     |
| Desai EJ et al. [69]        | 100  | 20  | 20%    | NA                                                                                                                     |
| Nasir \n et al. [70]        | 10   | 7   | 70%    | NA                                                                                                                     |
| Gupta's et al. [71]         | 56   | 9   | 16%    | NA                                                                                                                     |
| Joshi S et al. [4]          | 178  | 26  | 15%    | NA                                                                                                                     |
| Pradhan P et al. [72]       | 46   | 9   | 19.5%  | NA                                                                                                                     |
| Mehta RNM et al. [73]       | 215  | 26  | 12.1%  | Cerebral disease                                                                                                       |
| Riad A et al. [74]          | 7    | 0   | 0%     |                                                                                                                        |
| Guzmán-Castro S et al. [75] | 6    | 5   | 83.3%  | NA                                                                                                                     |
| Seidel D et al. [76]        | 13   | 7   | 53.8%  | NA                                                                                                                     |
| Gupta R et al. [77]         | 115  | 25  | 21.7%  | CT scan-based score for severity of lung involvement                                                                   |
| Alfishawy M et al. [78]     | 21   | 7   | 33.3%  | NA                                                                                                                     |
| Dave TV et al. [79]         | 58   | 20  | 34%    | CNS involvement                                                                                                        |
| Selarka L et al. [80]       | 47   | 11  | 23.4%  | NA                                                                                                                     |
| Avatef Fazeli M et al. [81] | 12   | 8   | 66.7%  | NA                                                                                                                     |
| Mishra Y et al. [82]        | 32   | 4   | 12.5%  | NA                                                                                                                     |
| Sen M et al. [83]           | 2218 | 305 | 14%    | NA                                                                                                                     |
| Pakdel F et al. [84]        | 15   | 7   | 47%    | NA                                                                                                                     |
| Y M. Reddy et al. [85]      | 6    | 6   | 100%   | NA                                                                                                                     |
| R.Arora et al. [86]         | NA   | NA  | NA     | NA                                                                                                                     |
| D.P Gupta et al. [87]       | 70   | 4   | 5.7%   | NA                                                                                                                     |
| M.Gautam et al. [88]        | 30   | 0   | 0%     | NA                                                                                                                     |
| R.M.Mehta et al. [89]       | 5    | 4   | 80%    | NA                                                                                                                     |
| Y.M.Reddy et al. [90]       | 31   | 11  | 35.5%  | NA                                                                                                                     |
| S.P.Singh et al. [91]       | 6    | 1   | 16.7%  | NA                                                                                                                     |



|                              |     |    |       |                                                                                   |
|------------------------------|-----|----|-------|-----------------------------------------------------------------------------------|
| M.Hada et al. [92]           | NA  | NA | NA    | NA                                                                                |
| M. Kumar H et al. [93]       | 23  | 17 | 73.9% | NA                                                                                |
| S. Bhandari et al. [94]      | NA  | NA | NA    | NA                                                                                |
| M Chouhan et al. [95]        | 41  | 4  | 9.8%  | NA                                                                                |
| Y. Singh et al. [96]         | 13  | 9  | 69.2% | NA                                                                                |
| S M Desai et al. [97]        | 50  | 15 | 30%   | NA                                                                                |
| A. Kumari et al. [98]        | 20  | 6  | 30%   | NA                                                                                |
| S. Mitra et al. [99]         | NA  | NA | NA    | NA                                                                                |
| A Ramaswami et al. [100]     | NA  | NA | NA    | NA                                                                                |
| A.R. Joshi et al. [101]      | 25  | 14 | 56%   | NA                                                                                |
| A. Patel et al. [102]        | 170 | 75 | 44.1% | age, site of involvement (rhino-orbital-cerebral or pulmonary), and ICU admission |
| S Sharma et al. [103]        | NA  | NA | NA    | NA                                                                                |
| R. Kant et al. [104]         | 100 | 13 | 13%   | NA                                                                                |
| C. Eker et al. [105]         | 15  | 5  | 33.3% | NA                                                                                |
| A.K. Pandit et al. [106]     | 49  | 15 | 30.6% | NA                                                                                |
| S.F. Youssif et al. [107]    | 33  | 30 | 90.9% | NA                                                                                |
| A. Sekaran, et al. [108]     | 30  | 5  | 16.7% | NA                                                                                |
| R. R. Shabana et al. [109]   | 30  | 6  | 20%   | NA                                                                                |
| A. K Patel et al. [110]      | 64  | 3  | 4.7%  | NA                                                                                |
| H. D.D. Martins et al. [111] | 6   | 1  | 16.7% | NA                                                                                |
| S. Iqtadar et al. [112]      | 7   | 1  | 14.3% | NA                                                                                |
| A. Al Balushi et al. [113]   | 10  | 6  | 60%   | NA                                                                                |
| R. Soman et al. [114]        | 28  | 7  | 25%   | NA                                                                                |

HRCT : High-resolution computed tomography, qSOFA : quick Sequential Organ Failure Assessment, MV : Mechanical ventilation, NA: not available, NIV: non – invasive ventilation, CKD: chronic kidney disease, CNS: central nervous system, ROCM: rhino- orbital- cerebral mucormycosis

**Table S6: Percentage of deaths with cerebral and pulmonary involvement.**

| <b>Study</b>              | <b>% (n) of deaths with cerebral involvement</b> | <b>% (n) of deaths with pulmonary involvement</b> |
|---------------------------|--------------------------------------------------|---------------------------------------------------|
| Said Ahmed WM et al. [29] | -                                                | -                                                 |
| Murthy R et al. [30]      | -                                                | -                                                 |
| Walia S et al. [31]       | 88% (44/50)                                      | NA                                                |
| Vare AA et al. [32]       | NA                                               | -                                                 |
| Fouad YA et al. [33]      | -                                                | -                                                 |
| Soni K te al. [34]        | NA                                               | -                                                 |
| Metwally MI et al. [35]   | NA                                               | -                                                 |
| Arora U et al. [36]       | NA                                               | NA                                                |
| Jindal G et al. [37]      | NA                                               | -                                                 |
| Syed-Abdul S et al. [38]  | NA                                               | NA                                                |
| Patel A et al. [3]        | NA                                               | NA                                                |
| Pruthi H et al. [39]      | -                                                | 100% (4/4)                                        |
| Bansal SB et al. [40]     | NA                                               | 0% (0/2)                                          |
| Dulski TM et al. [41]     | NA                                               | NA                                                |
| Meshram HS et al. [42]    | NA                                               | 31.3% (5/16)                                      |
| Aggarwal SK et al. [43]   | 50% (1/2)                                        | -                                                 |
| Kulkarni R et al. [44]    | NA                                               | -                                                 |
| Choksi T et al. [45]      | NA                                               | -                                                 |
| Kumar S et al. [46].      | NA                                               | -                                                 |
| Mehta R et al. [47]       | NA                                               | -                                                 |
| Panwar P et al. [48]      | -                                                | -                                                 |
| Patel DD et al. [49]      | NA                                               | -                                                 |
| Vaid N et al. [50]        | 100% (7/7)                                       | -                                                 |
| Goddanti N et al. [51]    | NA                                               | -                                                 |
| Yadav T et al. [52]       | NA                                               | -                                                 |
| Meshram VB et al. [53]    | 66.7% (2/3)                                      | 33.3% (1/3)                                       |
| Zirpe K et al. [54]       | 38.5% (5/13)                                     | -                                                 |

|                             |               |              |
|-----------------------------|---------------|--------------|
| Alloush TK et al. [55]      | NA            | -            |
| Pal P et al. [56]           | 33.3% (1/3)   | -            |
| Danion F et al. [57]        | NA            | 53.3% (8/15) |
| Nehara HR et al. [58]       | NA            | -            |
| Pandiar D et al. [59]       | NA            | -            |
| Kumar S et al. [60]         | NA            | -            |
| Bilgic A et al. [61]        | NA            | -            |
| Guemas E et al. [62]        | -             | 100% (5/5)   |
| Kumar SG et al. [63]        | NA            | -            |
| Mani S et al. [64]          | 66.7% (2/3)   | -            |
| Dravid A et al. [65]        | 86.7% (13/15) | -            |
| Naruka S et al. [66]        | 57.1% (8/14)  | -            |
| Jain K et al. [67]          | 60% (3/5)     | -            |
| Bhanuprasad K et al. [68]   | NA            | -            |
| Desai EJ et al. [69]        | -             | -            |
| Nasir \n et al. [70]        | 14.3% (1/7)   | 85.7% (6/7)  |
| Gupta\s et al. [71]         | NA            | NA           |
| Joshi S et al. [4]          | NA            | -            |
| Pradhan P et al. [72]       | 55.6% (5/9)   | -            |
| Mehta RNM et al. [73]       | 57.7% (15/26) | -            |
| Riad A et al. [74]          | -             |              |
| Guzmán-Castro S et al. [75] | 80% (4/5)     | 20% (1/5)    |
| Seidel D et al. [76]        | 0% (0/7)      | 85.7% (6/7)  |
| Gupta R et al. [77]         | NA            | -            |
| Alfishawy M et al. [78]     | 71.4% (5/7)   | 0% (0/7)     |
| Dave TV et al. [79]         | NA            | -            |
| Selarka L et al. [80]       | 36.4% (4/11)  | -            |
| Avatef Fazeli M et al. [81] | -             | -            |
| Mishra Y et al. [82]        | -             | -            |

|                              |               |              |
|------------------------------|---------------|--------------|
| Sen M et al. [83]            | NA            | -            |
| Pakdel F et al. [84]         | NA            | -            |
| Y M. Reddy et al. [85]       | 0% (0/6)      | -            |
| R.Arora et al. [86]          | NA            | -            |
| D.P Gupta et al. [87]        | NA            | -            |
| M.Gautam et al. [88]         | NA            | -            |
| R.M.Mehta et al. [89]        | -             | 100% (4/4)   |
| Y.M.Reddy et al. [90]        | NA            | -            |
| S.P.Singh et al. [91]        | 0% (0/1)      | -            |
| M.Hada et al. [92]           | NA            | -            |
| M. Kumar H et al. [93]       | 64.7% (11/17) | 11.8% (2/17) |
| S. Bhandari et al. [94]      | NA            | NA           |
| M Chouhan et al. [95]        | NA            | -            |
| Y. Singh et al. [96]         | 22.2% (2/9)   | 11.1% (1/9)  |
| S M Desai et al. [97]        | NA            | -            |
| A. Kumari et al. [98]        | 66.7% (4/6)   | -            |
| S. Mitra et al. [99]         | NA            | -            |
| A Ramaswami et al. [100]     | NA            | -            |
| A.R. Joshi et al. [101]      | NA            | -            |
| A. Patel et al. [102]        | NA            | NA           |
| S Sharma et al. [103]        | NA            | -            |
| R. Kant et al. [104]         | NA            | NA           |
| C. Eker et al. [105]         | 40% (2/5)     | -            |
| A.K. Pandit et al. [106]     | NA            | -            |
| S.F. Youssif et al. [107]    | NA            | -            |
| A. Sekaran, et al. [108]     | NA            | -            |
| R. R. Shabana et al. [109]   | NA            | -            |
| A. K Patel et al. [110]      | NA            | NA           |
| H. D.D. Martins et al. [111] | NA            | -            |
| S. Iqtadar et al. [112]      | NA            | -            |
| A. Al Balushi et al. [113]   | 50% (3/6)     | -            |
| R. Soman et al. [114]        | NA            | -            |

NA: not available, - : no cerebral or pulmonary involvement
